# Supplementary material for: Detection of Influenza virus and Streptococcus pneumoniae in air sampled from co-infected ferrets and analysis of their influence on pathogen stability
Source: PubMed Central journal article supplement — bioRxiv. 2023 Feb 25:2023.02.24.529988. Preprint. [Version 1] doi: 10.1101/2023.02.24.529988 (PMC9980167; doi:10.1101/2023.02.24.529988), 2023-02-25
Supplement: NIHPP2023.02.24.529988v1-supplement-1.pdf [file NIHPP2023.02.24.529988v1-supplement-1.pdf]

| Supplemental Table 1. Average log decay for H1N1pdm09 or Spn in droplets                                                                                             |                     |                                         |                |                                   |                |
|----------------------------------------------------------------------------------------------------------------------------------------------------------------------|---------------------|-----------------------------------------|----------------|-----------------------------------|----------------|
|                                                                                                                                                                      |                     | Log <sub>10</sub> Decay H1N1pdm09 ± SEM |                | Log <sub>10</sub> Decay Spn ± SEM |                |
| ASL Donor                                                                                                                                                            | HBE Donor Condition | H1N1pdm09                               | H1N1pdm09/Spn  | Spn                               | H1N1pdm09/Spn  |
| 0223                                                                                                                                                                 | COPD                | 2.333 ± 0.068*                          | 1.667 ± 0.068* | 3.187 ± 0.067*                    | 2.565 ± 0.002* |
| 0259                                                                                                                                                                 | COPD                | 1.083 ± 0.136                           | 1.125 ± 0.118  | 3.071 ± 0.101*                    | 2.577 ± 0.033* |
| 0284                                                                                                                                                                 | IPF                 | 0.958 ± 0.180                           | 1.292 ± 0.180  | 4.950 ± 0.415*                    | 2.848 ± 0.148* |
| 0305                                                                                                                                                                 | COPD                | 1.00 ± 0.118                            | 0.708 ± 0.272  | 4.237 ± 0.333                     | 3.256 ± 0      |
| An asterisk indicates the p-value was less than 0.05 when comparing droplets of individual microbes to droplets with both microbes using a Welch's unpaired t-tests. |                     |                                         |                |                                   |                |

## 208 **Supplemental Materials and Methods**

### 209 Virus and Bacteria

210 A/California/07/2009 (H1N1pdm09) was grown in minimum essential media in Madin-Darby  
211 Canine Kidney (MDCK) cells at 37°C for 48 hours and collected by centrifuging supernatant to  
212 remove cell debris. Quantification of virus was performed using the 50% tissue culture infectious  
213 dose assay (TCID<sub>50</sub>) of 10-fold serial dilution on MDKC cells in 96-well plates and subsequent  
214 assessment for cytopathic effects 4 days after plating.

215 *S. pneumoniae* D39 (Spn) was grown in Columbia broth at 37°C. Quantification of bacterial  
216 burden was performed by plating 10-fold serial dilutions on blood agar plates and counting  
217 colony-forming units after incubation at 37°C overnight.

### 218 Animals

219 Experiments involving ferrets were performed at the University of Pittsburgh under BSL2 safety  
220 conditions (IACUC protocol 19075697). Four to six-month male ferrets were confirmed to be  
221 seronegative for influenza infection prior to purchase. Animals were intranasally infected with  
222 10<sup>6</sup> TCID<sub>50</sub> of H1N1pdm09 in 500 µL total volume and 10<sup>7</sup> CFU of Spn in 500 µL. Ferrets were  
223 sedated using isoflurane prior to nasal wash collection, performed by collecting the flow-through  
224 of PBS passed through the nostrils.

### 225 Air Sampling

226 Infectious virus and bacteria were collected using the Liquid Spot Sampler (Aerosol Devices Inc,  
227 Series 110), which uses condensation to collect aerosols into a collection vial. Air was collected  
228 from infected animals in a 7 liter chamber connected to the Spot sampler via anti-static tubing for

15 minutes each day at a rate of 1.4L/minute (Supplemental Figure 1). Sampling was performed on days 3, 4, and 5 post-H1N1pdm09 infection (days 1, 2, and 3 post-Spn infection) and prior to nasal wash collection. Condensed aerosols were collected in 700μL 0.5% BSA in PBS. Samples were immediately plated to quantify expelled bacteria and the remaining sample was used for virus titration as described above.

Aerosol sampling of H1N1pdm09/Spn-infected ferrets was performed using cyclone-based air samplers (BC251 developed by NIOSH) on days 3, 4, and 5 post-H1N1pdm09 infection to collect microbial genomic material. Samplers, calibrated to collect 3.5L of air per minute, were placed downwind of infected animals in cages with directional airflow and were run for 1 hour. Samplers fractionated aerosols into three sizes: aerosols >4μm, 1-4μm, and <1μm diameter. After aerosol collection, samplers were washed with isopropanol and allowed to air-dry to avoid contamination.

RNA was isolated using 500μL MagMAX Lysis/Binding Solution Concentrate in each collection tube with thorough vortexing. QIAamp viral RNA mini kit was used to isolate DNA and RNA from lysis solution. Viral and bacterial genome copies were quantified using RT-qPCR with primers against influenza M gene (Forward 5'-AGATGAGTCTTCTAACCGAGGTCG-3' ; Reverse 5'-GCAAAGACACTTTCCAGTCTCTG-3' ; Probe 5'-[FAM]TCAGGCCCCCTCAAAGCCGA[3BHQ1] -3') or *S. pneumoniae* lytA gene (Forward 5'-ACGCAATCTAGCAGATGAAGCA-3' ; Reverse 5'-TCGTGCGTTTTTAATTCCAGCT-3' ; Probe 5'-[HEX]GCCGAAAACGCTTGATACAGGGAG[BHQ1]-3'). *In vitro* transcribed RNA was used to make a standard curve for influenza virus, and *S. pneumoniae* genomic DNA was serially diluted to generate a standard curve for Spn. Limits of detection were determined by a Ct = 40 or a positive day 0 sample.

## Stability Experiments

Inside a biosafety cabinet, a saturated salt solution of  $K_2CO_3$  was used to condition a glass chamber to 43% relative humidity, and a HOBO UX-100-011 logger was used to record temperature and humidity conditions during each ASL replicate (Figure 2E). Experimental solutions were generated using  $10^{7.15}$  CFU/mL Spn,  $10^{7.15}$  TCID<sub>50</sub>/mL H1N1pdm09, and a 1:5 dilution in PBS of airway surface liquid collected from human bronchial epithelial cells. Ten 1  $\mu$ L droplets were incubated on polystyrene tissue culture plates in the conditioned chamber for two hours. Controls were 10  $\mu$ L samples of each microbial solution in closed tubes that were incubated for 2 hours at ambient temperature during the chamber experiments. Log<sub>10</sub> decay was calculated as previously described and represents the loss in virus or bacterial infectivity (21). Log<sub>10</sub> decay was determined for each droplet replicate by subtracting the titer of the droplets from the average of the controls for the corresponding ASL. Experiments were performed using technical triplicates for droplets and technical duplicates for controls.

Human lung tissue collected using an approved protocol was used to differentiate human bronchial epithelial cells as previously described (22). Airway surface liquid was collected by washing differentiated cells with 150  $\mu$ L PBS and collecting the wash (3). All HBE donors were diagnosed with chronic obstructive pulmonary disease (COPD), except for HBE 0284, which came from a patient diagnosed with idiopathic pulmonary fibrosis.

## Data Availability

The data that supports the findings shown here will be made openly available in FigShare at DOI: 10.6084/m9.figshare.22129055 upon publication. Some of the stability experiments were previously made available on BioRxiv at <https://doi.org/10.1101/2020.11.10.376442>

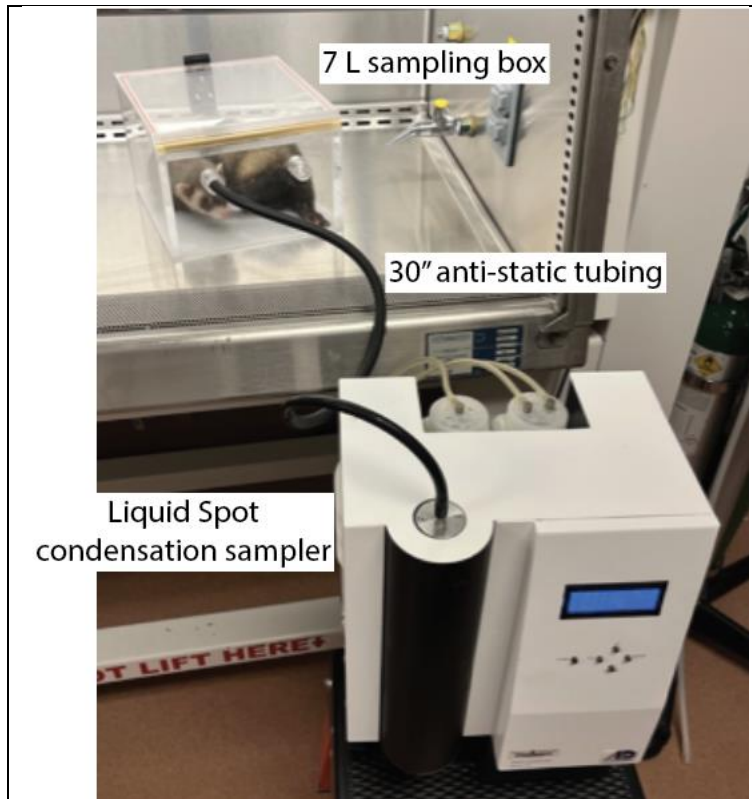

**Supplemental Figure 1.** The Liquid Spot condensation sampler was used to collect infectious material from co-infected animals. Co-infected animals were placed in a sampling box for 15 minutes while sampling was performed. Anti-static tubing connected the sampling box to the inlet of the sampler.

274
